# Supplementary material for: Next generation haplotyping to decipher nuclear genomic interspecific admixture in Citrus species: analysis of chromosome 2
Source: PubMed Central journal article supplement (PMC4302129; doi:10.1186/s12863-014-0152-1), 2014-12-29
Supplement: 12863_2014_152_MOESM10_ESM.pdf [file 12863_2014_152_MOESM10_ESM.pdf]

Next generation haplotyping to decipher the nuclear genomic interspecific admixture in Citrus species; analysis of the Chromosome 2. Curk et al. BMC genomic, Additional file 10.

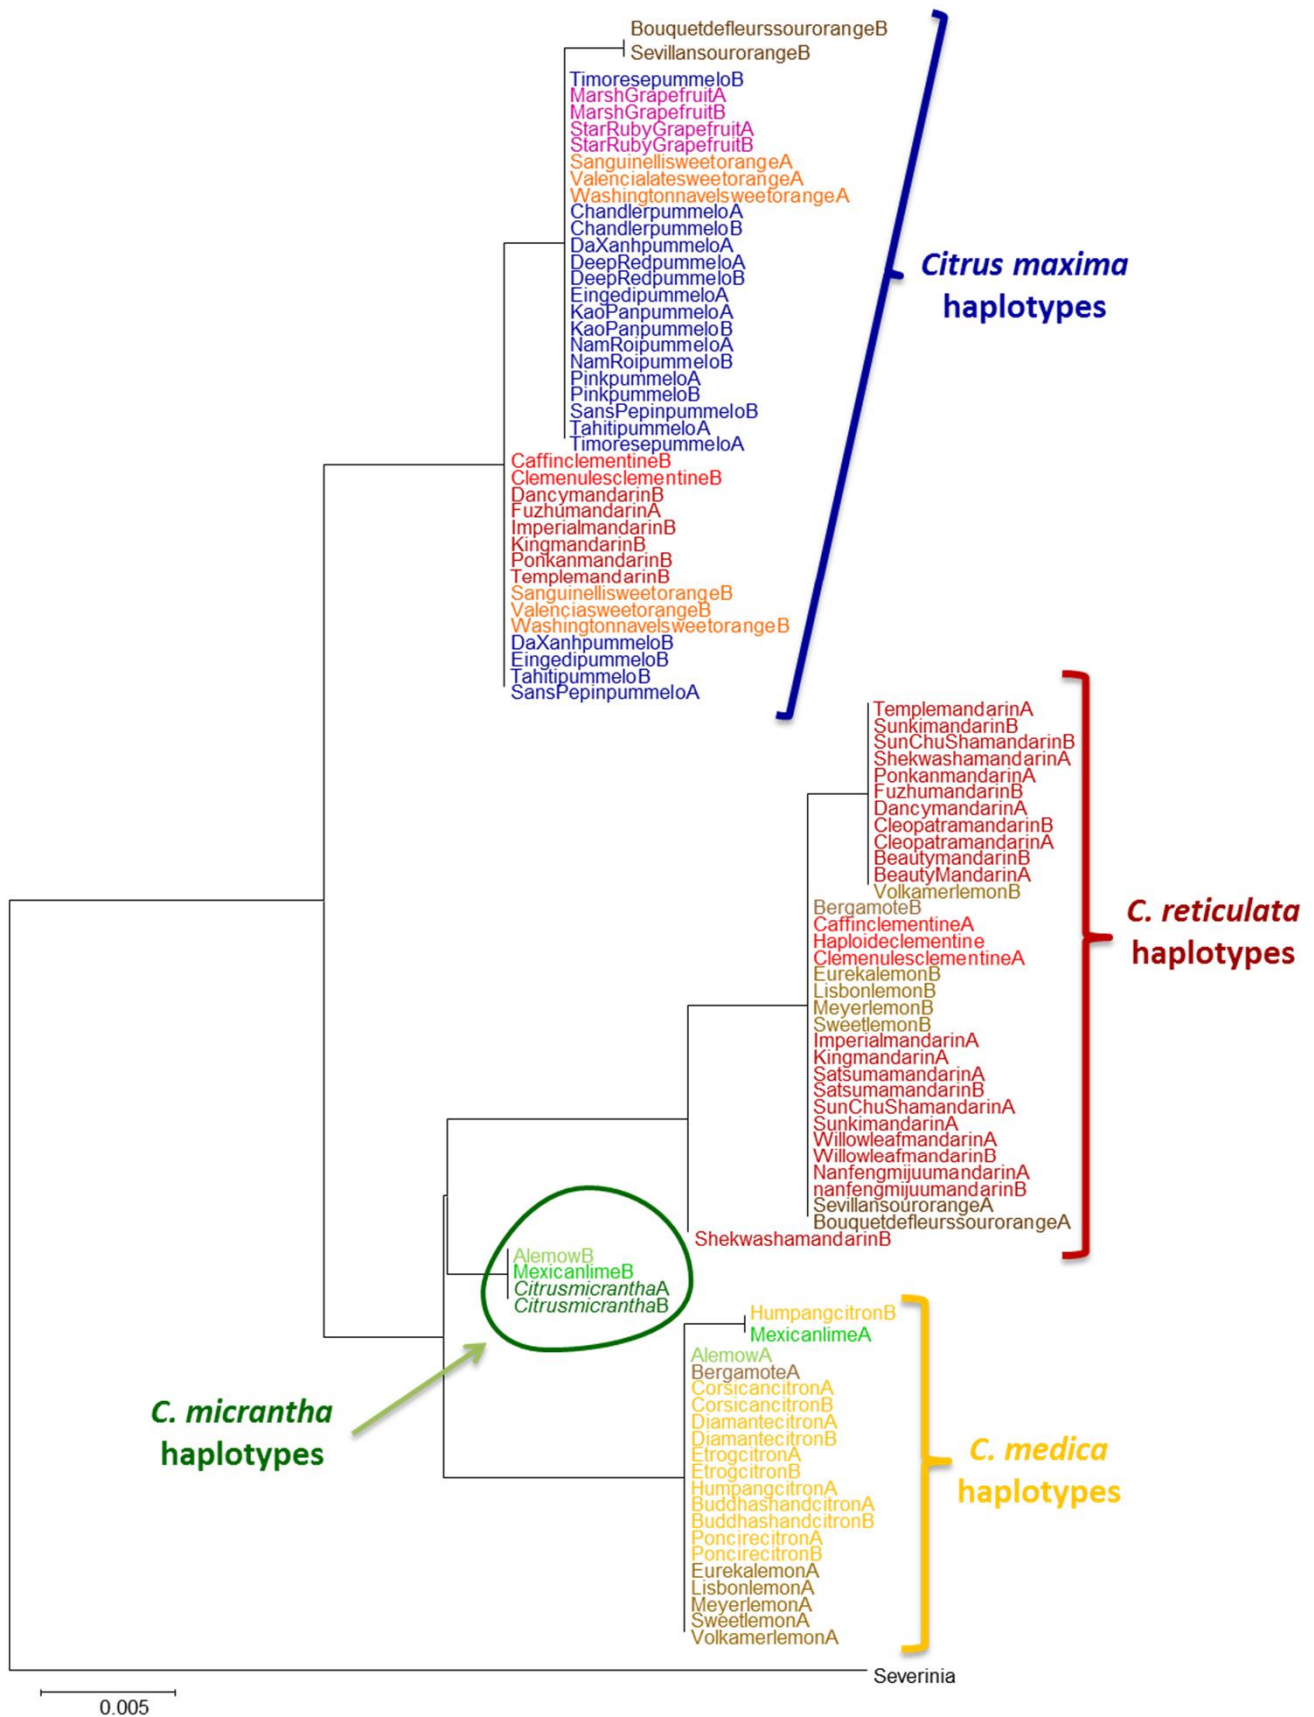

Additional File 10: Maximum likelihood phylogenetic tree of the haplotypic data of the 2P35391362 gene fragment.
