# Supplementary material for: Next generation haplotyping to decipher nuclear genomic interspecific admixture in Citrus species: analysis of chromosome 2
Source: PubMed Central journal article supplement (PMC4302129; doi:10.1186/s12863-014-0152-1), 2014-12-29
Supplement: 12863_2014_152_MOESM13_ESM.pdf [file 12863_2014_152_MOESM13_ESM.pdf]

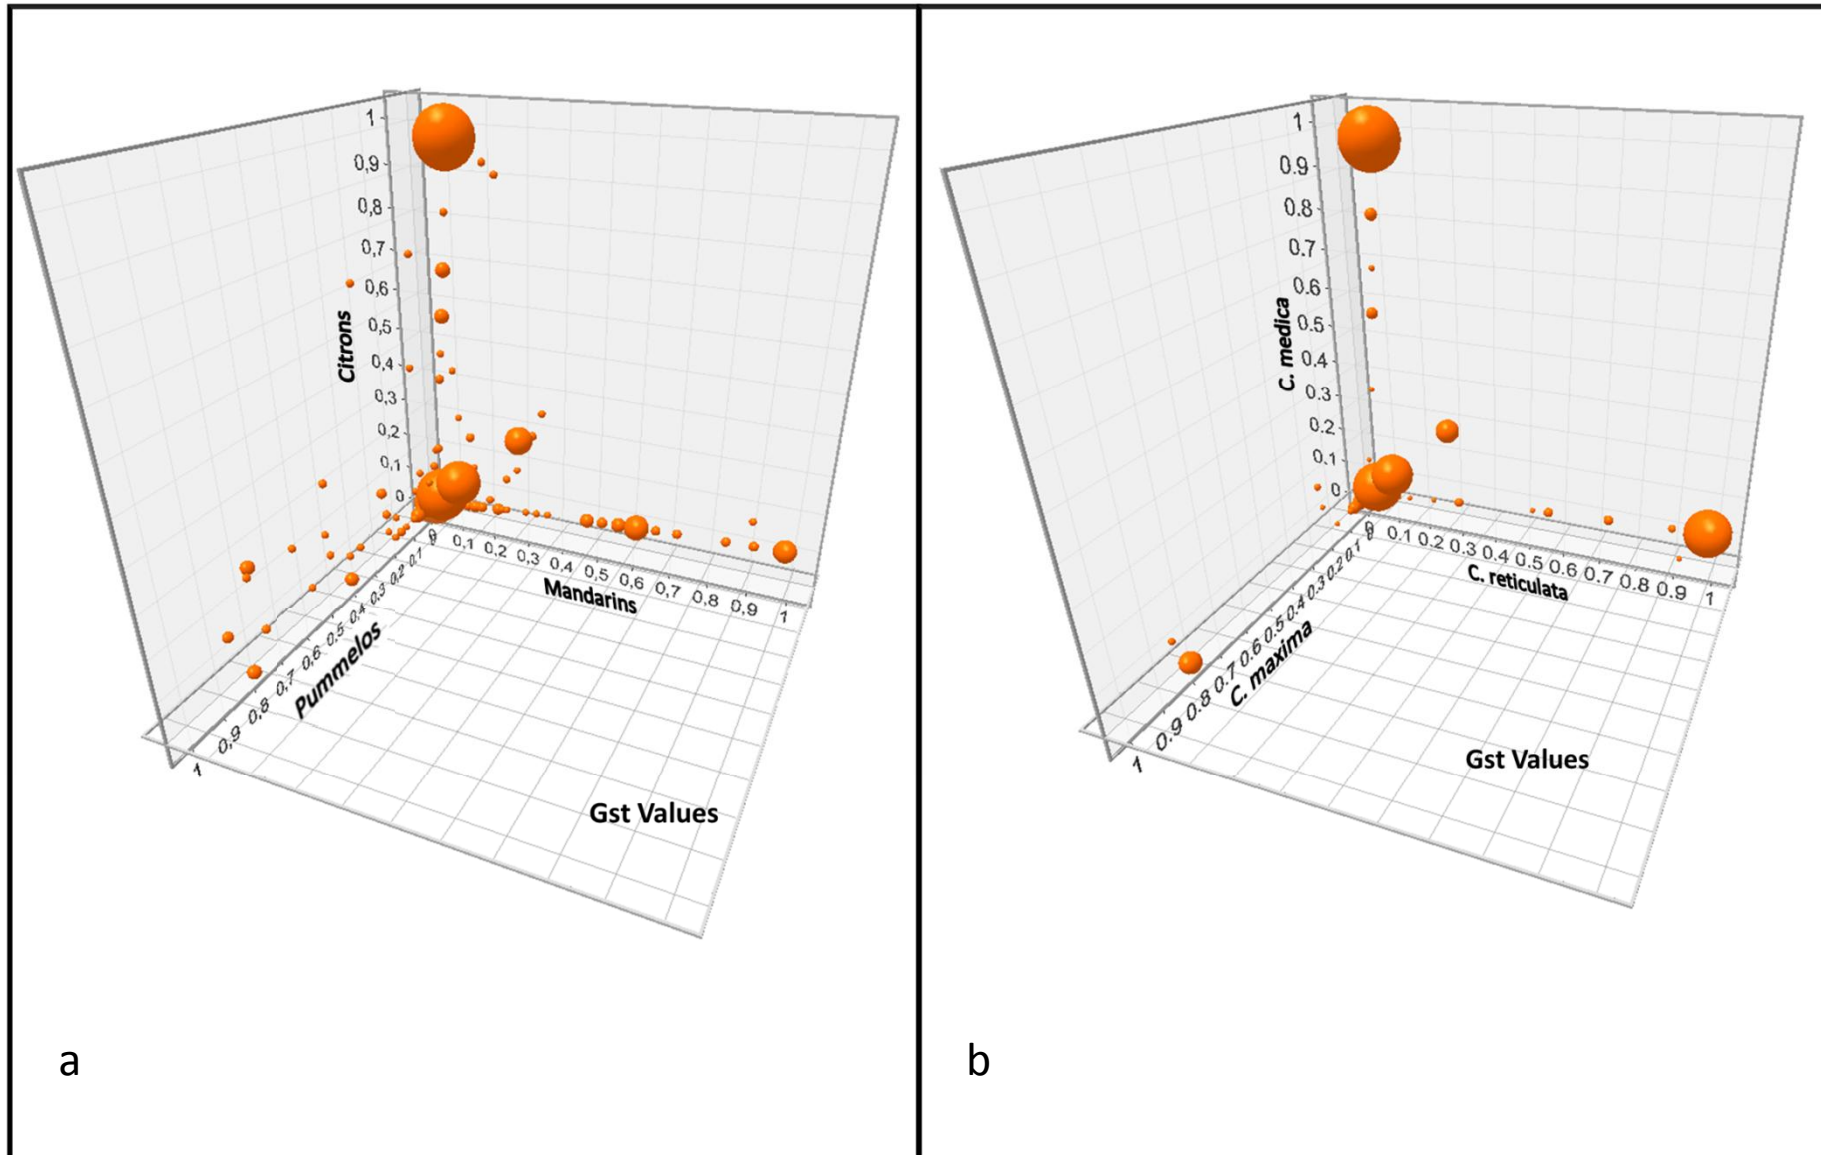

Additional file 13: 3D distribution of gene sequence SNPs according to their haplotypic  $G_{ST}$  value ; a:  $G_{ST}$  value for three horticultural groups (mandarins, pummelos and citrons); b:  $G_{ST}$  values for three basic taxa (*C. reticulata*, *C. maxima*, *C. medica*) after introgression information corrections.
